# Supplementary material for: Novel noncentrosymmetric polar coordination compounds derived from chiral histidine ligands
Source: Royal Society of Chemistry journal article supplement (doi:10.1039/d1qi00869b), 2021-01-01
Supplement: d1qi00869b1.pdf [file d1qi00869b1.pdf]

Electronic Supplementary Information (ESI) for

Novel noncentrosymmetric polar coordination compounds derived from chiral histidine ligands, (L- and D-Histidine)ZnBr<sub>3</sub> and (L- and D-Histidine)<sub>2</sub>Cd<sub>2</sub>Cl<sub>5</sub>

Wooyoung Seo and Kang Min Ok\*

Department of Chemistry, Sogang University, Seoul 04107, Republic of Korea

\*E-mail: kmok@sogang.ac.kr

Table of contents

| Sections    | Titles                                                                                                                                                                                        | pages  |
|-------------|-----------------------------------------------------------------------------------------------------------------------------------------------------------------------------------------------|--------|
| Figure S1.  | Experimental and calculated powder X-ray diffraction patterns of L-ZnBr and D-ZnBr.                                                                                                           | S2     |
| Figure S2.  | Experimental and calculated powder X-ray diffraction patterns of L-CdCl and D-CdCl.                                                                                                           | S2     |
| Figure S3.  | TGA diagrams for L-ZnBr, D-ZnBr, L-CdCl, and D-CdCl.                                                                                                                                          | S3     |
| Figure S4.  | Powder X-ray diffraction patterns for calcined products of ZnBr and CdCl.                                                                                                                     | S3     |
| Figure S5.  | IR spectra for L-ZnBr, D-ZnBr, L-CdCl, and D-CdCl.                                                                                                                                            | S4     |
| Figure S6.  | UV-vis spectra for L-histidine, D-histidine, L-ZnBr, D-ZnBr, L-CdCl, and D-CdCl.                                                                                                              | S5     |
| Figure S7.  | Total and partial density of state for (a) D-ZnBr and (b) D-CdCl.                                                                                                                             | S6     |
| Figure S8.  | Band structures for L-ZnBr, D-ZnBr, L-CdCl, and D-CdCl.                                                                                                                                       | S7     |
| Figure S9.  | Net moments and dipole moments of [ZnOBr <sub>3</sub> ] and [CdOCl <sub>4</sub> ] polyhedra in a unit cell for (a) L-ZnBr and (b) L-CdCl, respectively.                                       | S8     |
| Figure S10. | <sup>1</sup> H NMR (400 MHz, D <sub>2</sub> O, room temperature) and <sup>13</sup> C NMR (100 MHz, D <sub>2</sub> O, room temperature) spectra for (a) histidine, (b) L-ZnBr, and (c) L-CdCl. | S9-S11 |
| Table S1.   | Crystallographic Data for L-ZnBr, D-ZnBr, L-CdCl, and D-CdCl.                                                                                                                                 | S12    |
| Table S2.   | Selected distances (Å) for L-ZnBr.                                                                                                                                                            | S13    |
| Table S3.   | Selected distances (Å) for D-ZnBr.                                                                                                                                                            | S13    |
| Table S4.   | Selected distances (Å) for L-CdCl.                                                                                                                                                            | S14    |
| Table S5.   | Selected distances (Å) for D-CdCl.                                                                                                                                                            | S14    |
| Table S6.   | Hydrogen bond distances (Å) for L-ZnBr, D-ZnBr, L-CdCl, and D-CdCl.                                                                                                                           | S15    |

**Figure S1.** Experimental and calculated powder X-ray diffraction patterns of **L-ZnBr** and **D-ZnBr**.

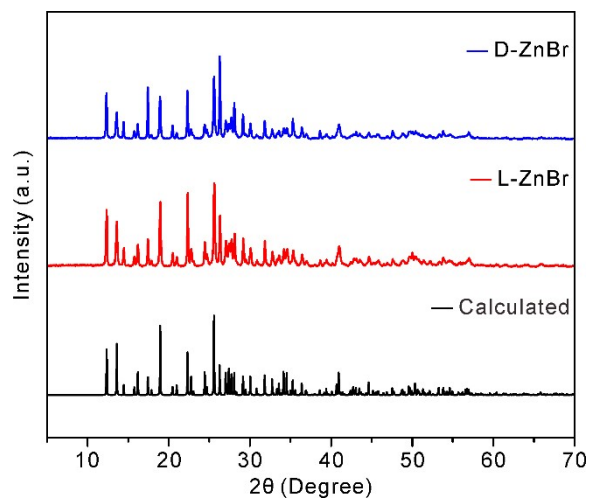

**Figure S2.** Experimental and calculated powder X-ray diffraction patterns of **L-CdCl** and **D-CdCl**.

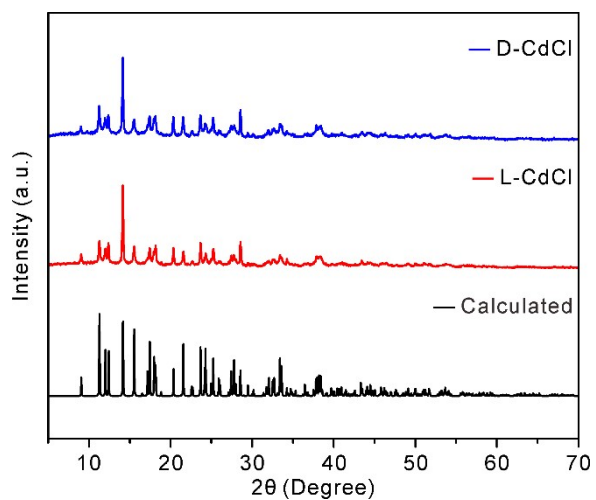

**Figure S3.** TGA diagrams for **L-ZnBr**, **D-ZnBr**, **L-CdCl**, and **D-CdCl**.

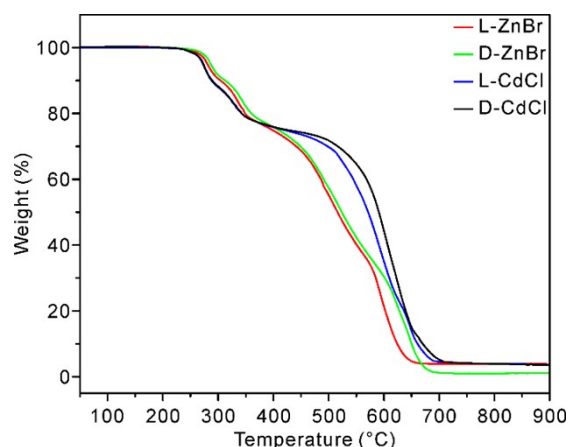

Upon further heating, weight losses attributed to the decomposition of coordinated histidine in the title compounds are observed. Compounds **L-ZnBr** and **D-ZnBr** further decompose to ZnO. The thermal decomposition can be represented by the following reaction:

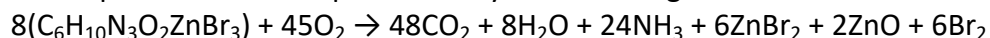

The experimental values of 3.9% and 2.5% for the decomposed residues of compounds **L-ZnBr** and **D-ZnBr**, respectively, match well with the theoretical value, 4.4%.

Similarly, Compounds **L-CdCl** and **D-CdCl** decompose to CdO, in which the thermal decomposition can be written as the following reaction:

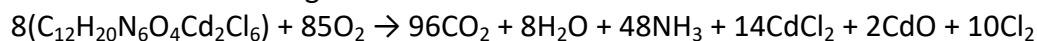

The experimental values of 4.5% and 4.3% for the decomposed residues of compounds **L-CdCl** and **D-CdCl**, respectively, match well with the theoretical value, 4.3%.

**Figure S4.** Powder X-ray diffraction patterns for calcined products of **ZnBr** and **CdCl**.

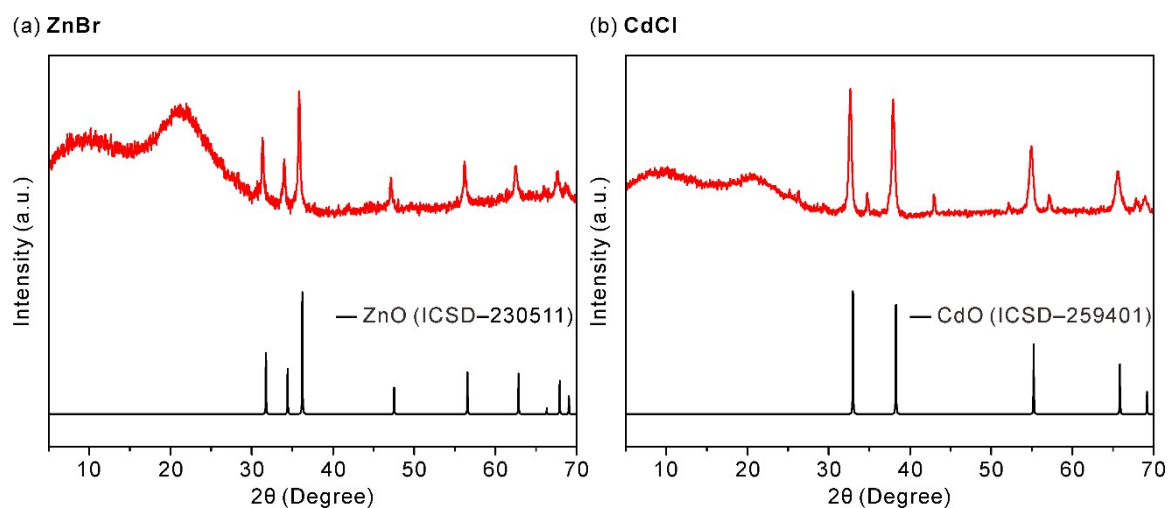

Figure S5. IR spectra for L-ZnBr, D-ZnBr, L-CdCl, and D-CdCl.

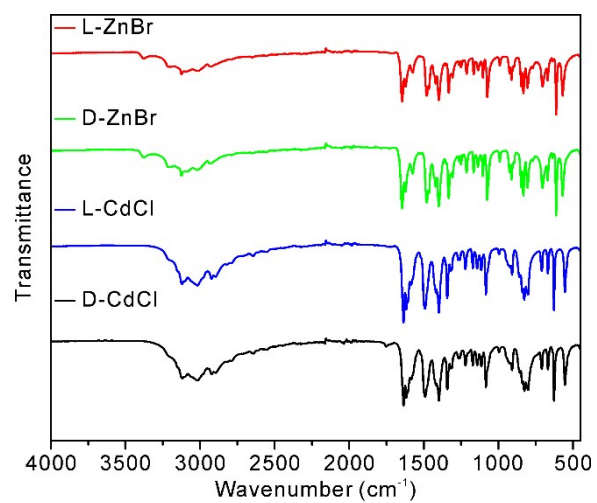

**Figure S6.** UV-vis spectra for L-histidine, D-histidine, L-ZnBr, D-ZnBr, L-CdCl, and D-CdCl.

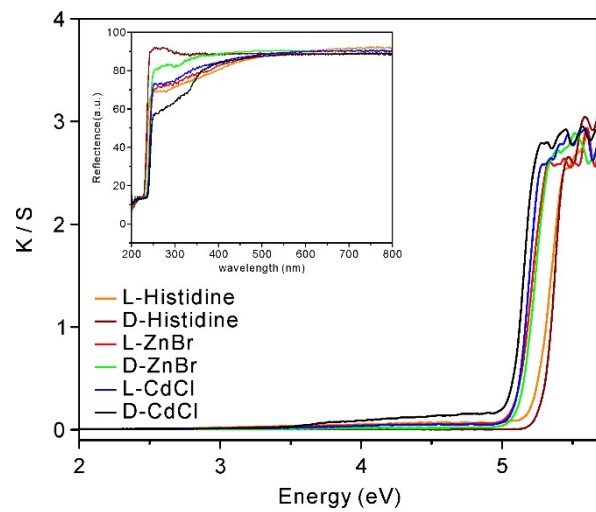

**Figure S7.** Total and partial density of state for (a) **D-ZnBr** and (b) **D-CdCl**.

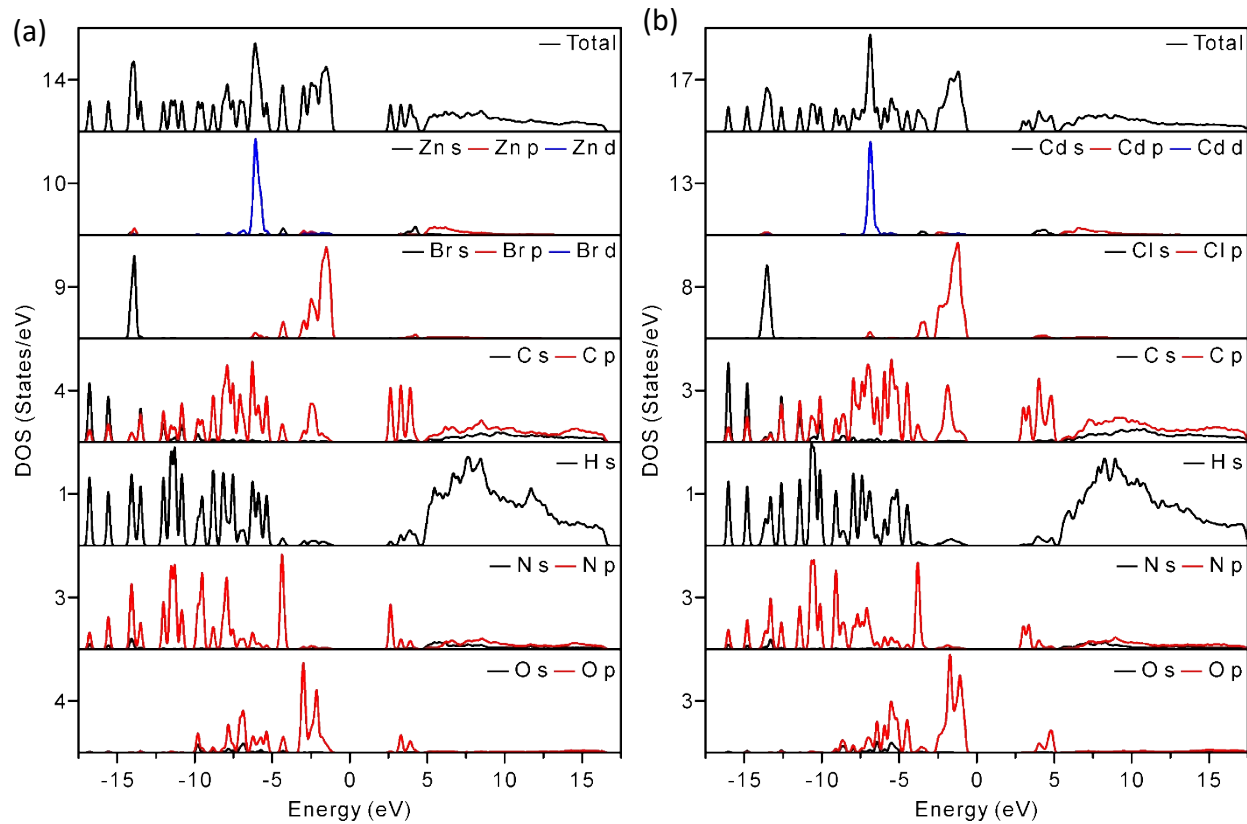

**Figure S8.** Band structures for L-ZnBr, D-ZnBr, L-CdCl, and D-CdCl.

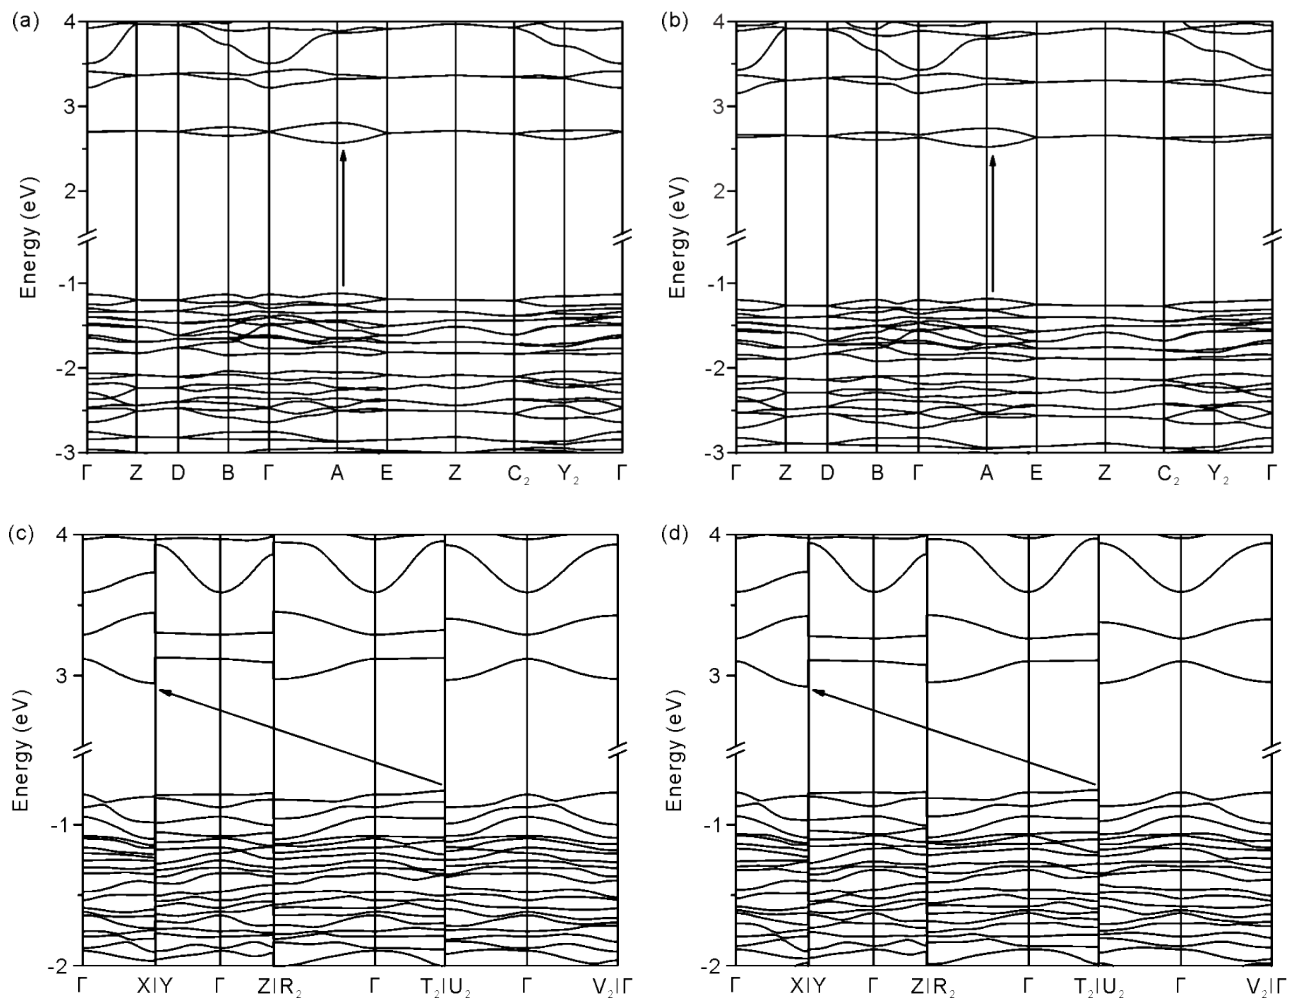

**Figure S9.** Net moments and dipole moments of  $[\text{ZnOBr}_3]$  and  $[\text{CdOCl}_4]$  polyhedra in a unit cell for (a) **L-ZnBr** and (b) **L-CdCl**, respectively.

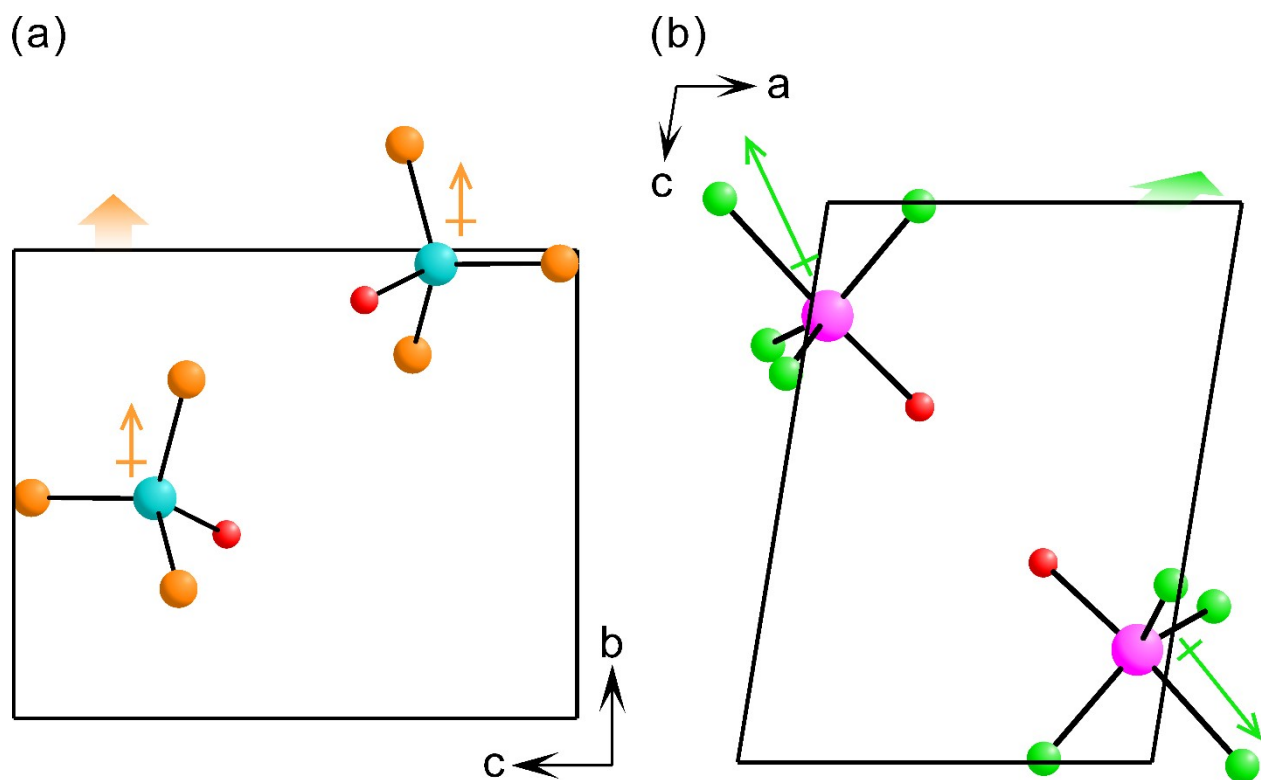



**Figure S10.**  $^1\text{H}$  NMR (400 MHz,  $\text{D}_2\text{O}$ , room temperature) and  $^{13}\text{C}$  NMR (100 MHz,  $\text{D}_2\text{O}$ , room temperature) spectra for (a) histidine, (b) **L-ZnBr**, and (c) **L-CdCl**.

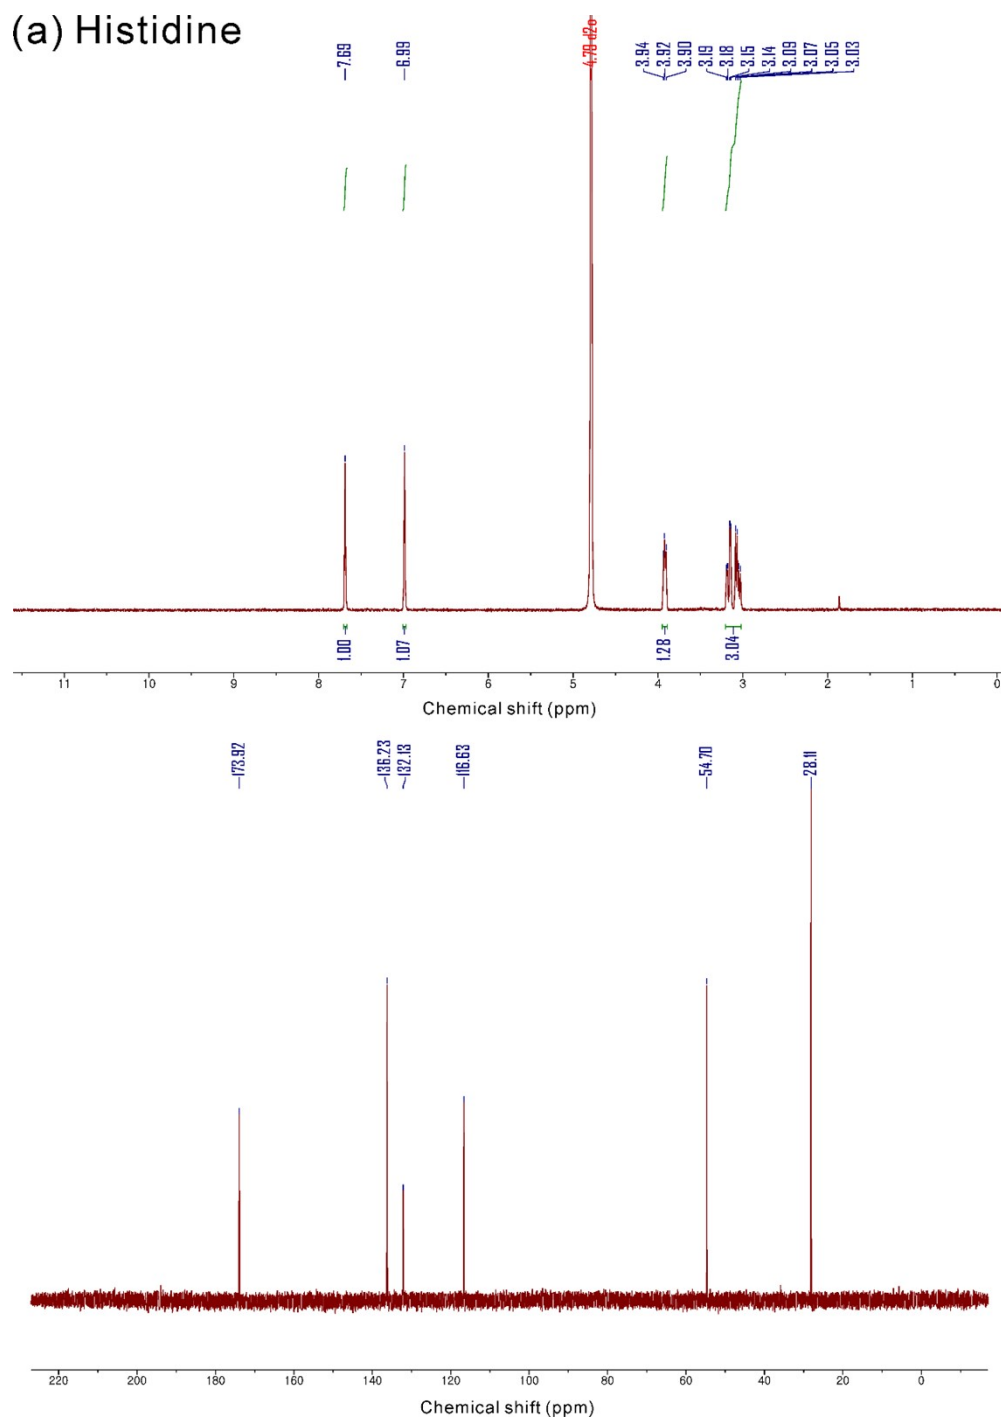

$^1\text{H}$  NMR (400 MHz,  $\text{D}_2\text{O}$ ):  $\delta$  7.69 (s, 1 H),  $\delta$  6.99 (s, 1 H),  $\delta$  3.94–3.90 (t, 1 H),  $\delta$  3.19–3.03 (m, 3 H)  
 $^{13}\text{C}$  NMR (100 MHz,  $\text{D}_2\text{O}$ ):  $\delta$  173.92, 136.23, 132.13, 116.63, 54.70, 28.11 ppm

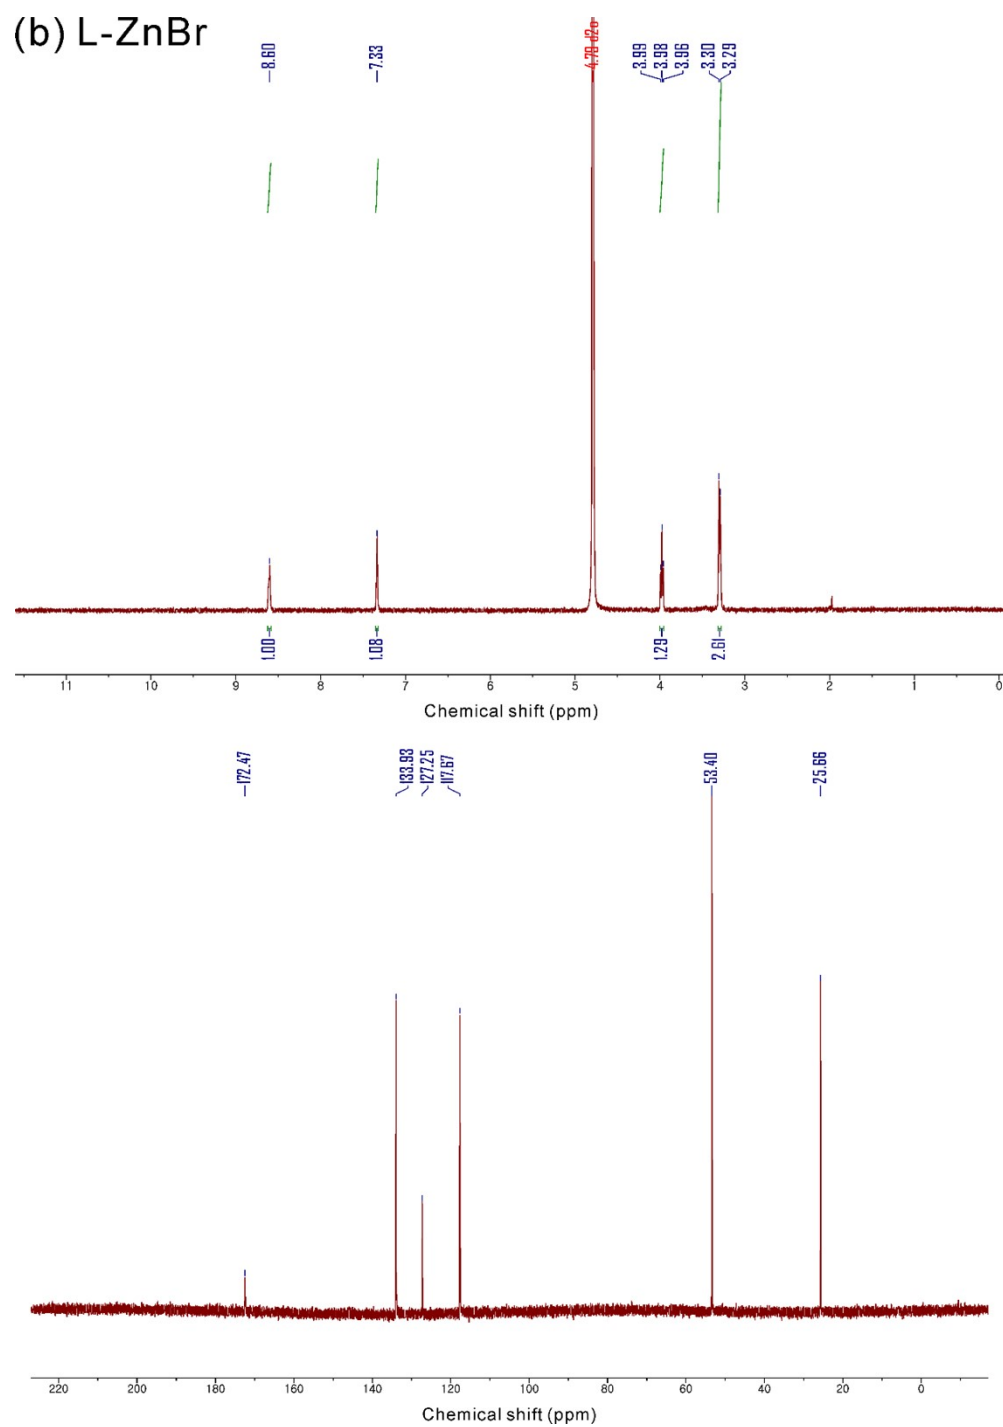

$^1\text{H}$  NMR (400 MHz,  $\text{D}_2\text{O}$ ):  $\delta$  8.60 (s, 1 H),  $\delta$  7.33 (s, 1 H),  $\delta$  3.99–3.96 (t, 1 H),  $\delta$  3.30–3.29 (d, 3 H)  
 $^{13}\text{C}$  NMR (100 MHz,  $\text{D}_2\text{O}$ ):  $\delta$  172.47, 133.93, 127.25, 117.67, 53.40, 25.66 ppm

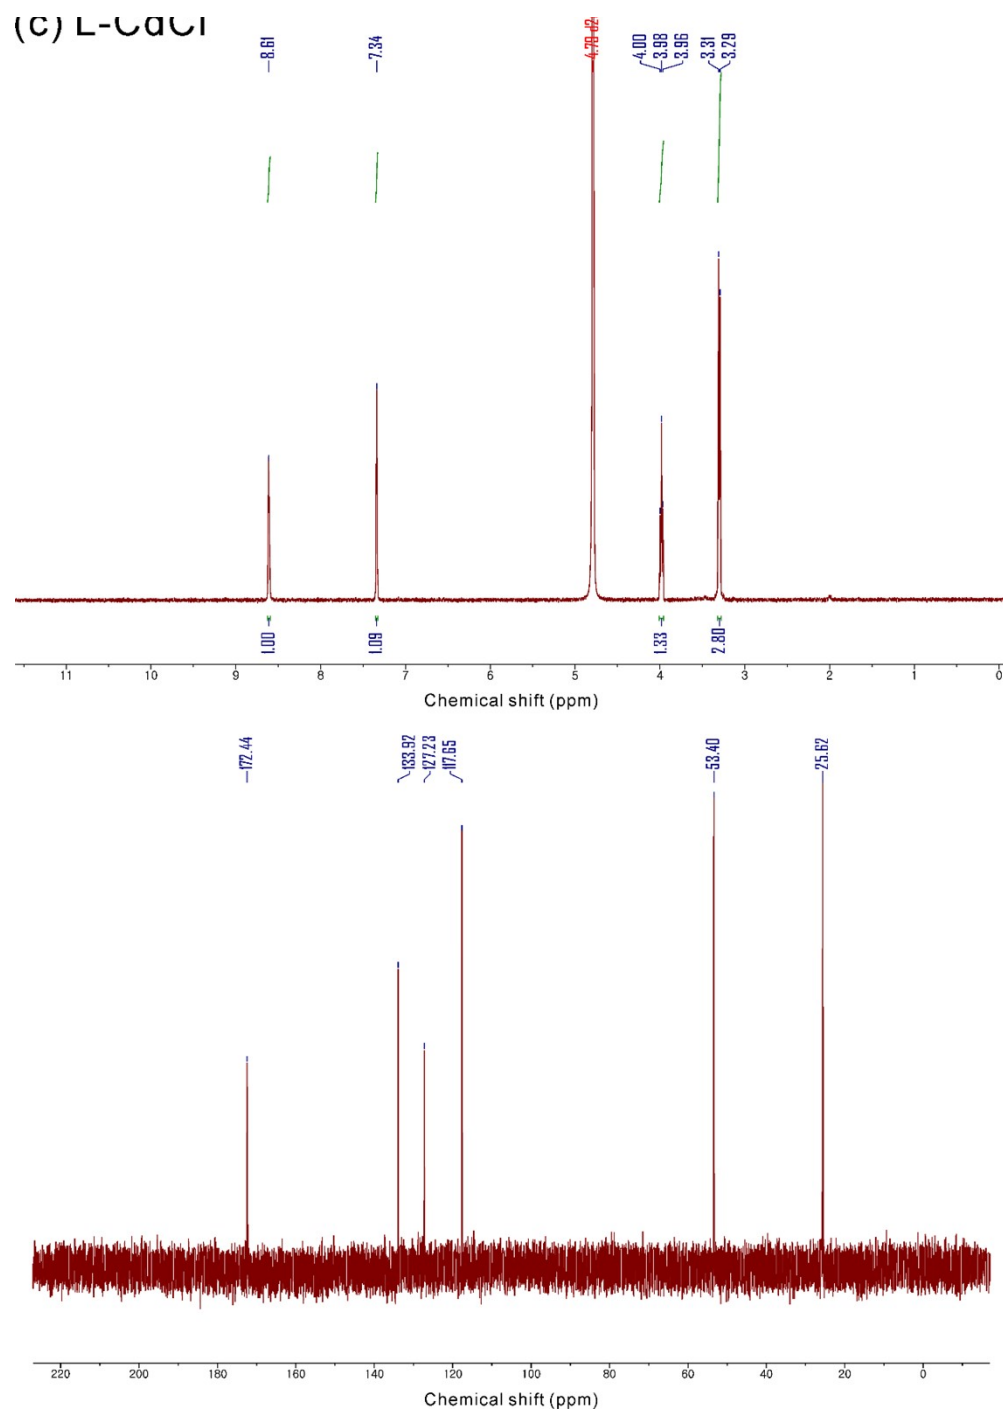

$^1\text{H}$  NMR (400 MHz,  $\text{D}_2\text{O}$ ):  $\delta$  8.61 (s, 1 H),  $\delta$  7.34 (s, 1 H),  $\delta$  4.00–3.96 (t, 1 H),  $\delta$  3.31–3.29 (d, 3 H)  
 $^{13}\text{C}$  NMR (100 MHz,  $\text{D}_2\text{O}$ ):  $\delta$  172.44, 133.92, 127.23, 117.65, 53.40, 25.62 ppm

**Table S1.** Crystallographic Data for **L-ZnBr**, **D-ZnBr**, **L-CdCl**, and **D-CdCl**.

| compound                                     | L-ZnBr                  | D-ZnBr     | L-CdCl                       | D-CdCl       |
|----------------------------------------------|-------------------------|------------|------------------------------|--------------|
| formula                                      | $C_6H_{10}N_3O_2ZnBr_3$ |            | $C_{12}H_{20}N_6O_4Cd_2Cl_6$ |              |
| Fw                                           | 461.27                  | 461.27     | 749.84                       | 749.84       |
| space group                                  | $P2_1$                  | $P2_1$     | $P1$                         | $P1$         |
| $a$ (Å)                                      | 7.1916(3)               | 7.1874(6)  | 7.2513(4)                    | 7.2590(5)    |
| $b$ (Å)                                      | 8.4614(4)               | 8.4578(8)  | 8.3073(5)                    | 8.3140(5)    |
| $c$ (Å)                                      | 10.2086(5)              | 10.1952(9) | 10.3629(6)                   | 10.3712(6)   |
| $\alpha$ (°)                                 | 90                      | 90         | 107.6430(10)                 | 107.6460(10) |
| $\beta$ (°)                                  | 95.1770(10)             | 95.224(3)  | 96.907(2)                    | 96.894(2)    |
| $\gamma$ (°)                                 | 90                      | 90         | 95.774(2)                    | 95.746(2)    |
| $V$ (Å <sup>3</sup> )                        | 618.67(5)               | 617.19(10) | 584.34(6)                    | 585.96(6)    |
| $Z$                                          | 2                       | 2          | 1                            | 1            |
| $T$ (K)                                      | 296(2)                  | 296(2)     | 296(2)                       | 296(2)       |
| $\lambda$ (Å)                                | 0.71073                 | 0.71073    | 0.71073                      | 0.71073      |
| $\rho_{\text{calcd}}$ (g/ cm <sup>-3</sup> ) | 2.476                   | 2.482      | 2.131                        | 2.125        |
| $R(F_o)^a$                                   | 0.0230                  | 0.0369     | 0.0153                       | 0.0187       |
| $R_w(F_o^2)^b$                               | 0.0544                  | 0.0820     | 0.0393                       | 0.0460       |
| Flack $x$                                    | 0.046(4)                | 0.028(7)   | 0.009(7)                     | -0.009(10)   |

$$^a R(F) = \sum ||F_o| - |F_c|| / \sum |F_o|,$$

$$^b R_w(F_o^2) = \{\sum w[(F_o)^2 - (F_c)^2]^2 / \sum w[(F_o)^2]^2\}^{1/2}.$$

**Table S2.** Selected distances (Å) for **L-ZnBr**.

|             |           |           |          |
|-------------|-----------|-----------|----------|
| Zn(1)–O(1)  | 2.013(3)  | C(2)–N(1) | 1.490(6) |
| Zn(1)–Br(2) | 2.3718(7) | C(2)–C(3) | 1.536(6) |
| Zn(1)–Br(3) | 2.3942(7) | C(3)–C(4) | 1.490(6) |
| Zn(1)–Br(1) | 2.4135(8) | C(4)–C(5) | 1.351(7) |
| C(1)–O(2)   | 1.231(6)  | C(4)–N(2) | 1.380(6) |
| C(1)–O(1)   | 1.270(6)  | C(5)–N(3) | 1.358(8) |
| C(1)–C(2)   | 1.530(5)  | C(6)–N(2) | 1.330(7) |
|             |           | C(6)–N(3) | 1.331(8) |

**Table S3.** Selected distances (Å) for **D-ZnBr**.

|             |            |           |           |
|-------------|------------|-----------|-----------|
| Zn(1)–O(1)  | 2.009(5)   | C(2)–N(1) | 1.497(9)  |
| Zn(1)–Br(2) | 2.3709(12) | C(2)–C(3) | 1.523(10) |
| Zn(1)–Br(3) | 2.3949(12) | C(3)–C(4) | 1.484(10) |
| Zn(1)–Br(1) | 2.4116(14) | C(4)–C(5) | 1.354(11) |
| C(1)–O(2)   | 1.238(9)   | C(4)–N(2) | 1.377(10) |
| C(1)–O(1)   | 1.259(9)   | C(5)–N(3) | 1.336(13) |
| C(1)–C(2)   | 1.511(9)   | C(6)–N(3) | 1.314(13) |
|             |            | C(6)–N(2) | 1.343(12) |

**Table S4.** Selected distances (Å) for **L–CdCl**.

|             |            |           |          |             |          |
|-------------|------------|-----------|----------|-------------|----------|
| Cd(1)–O(1)  | 2.324(3)   | C(1)–O(2) | 1.240(6) | C(7)–O(4)   | 1.226(6) |
| Cd(1)–Cl(2) | 2.4731(11) | C(1)–O(1) | 1.267(6) | C(7)–O(3)   | 1.266(6) |
| Cd(1)–Cl(1) | 2.4851(11) | C(1)–C(2) | 1.532(7) | C(7)–C(8)   | 1.545(6) |
| Cd(1)–Cl(3) | 2.5092(12) | C(2)–N(1) | 1.491(5) | C(8)–N(4)   | 1.478(6) |
| Cd(1)–Cl(5) | 2.7660(12) | C(2)–C(3) | 1.523(6) | C(8)–C(9)   | 1.534(6) |
| Cd(2)–O(3)  | 2.371(3)   | C(3)–C(4) | 1.492(6) | C(9)–C(10)  | 1.492(7) |
| Cd(2)–Cl(6) | 2.4525(12) | C(4)–C(5) | 1.356(6) | C(10)–C(11) | 1.346(7) |
| Cd(2)–Cl(5) | 2.4985(12) | C(4)–N(2) | 1.375(6) | C(10)–N(5)  | 1.379(6) |
| Cd(2)–Cl(4) | 2.5170(11) | C(5)–N(3) | 1.364(7) | C(11)–N(6)  | 1.392(7) |
| Cd(2)–Cl(3) | 2.7510(12) | C(6)–N(2) | 1.309(7) | C(12)–N(6)  | 1.312(8) |
|             |            | C(6)–N(3) | 1.320(8) | C(12)–N(5)  | 1.338(6) |

**Table S5.** Selected distances (Å) for **D–CdCl**.

|             |            |           |          |             |          |
|-------------|------------|-----------|----------|-------------|----------|
| Cd(1)–O(1)  | 2.329(3)   | C(1)–O(2) | 1.239(6) | C(7)–O(4)   | 1.231(6) |
| Cd(1)–Cl(2) | 2.4735(12) | C(1)–O(1) | 1.264(6) | C(7)–O(3)   | 1.277(6) |
| Cd(1)–Cl(1) | 2.4891(11) | C(1)–C(2) | 1.544(6) | C(7)–C(8)   | 1.536(7) |
| Cd(1)–Cl(3) | 2.5093(13) | C(2)–N(1) | 1.488(6) | C(8)–N(4)   | 1.484(6) |
| Cd(1)–Cl(5) | 2.7718(12) | C(2)–C(3) | 1.529(7) | C(8)–C(9)   | 1.532(7) |
| Cd(2)–O(3)  | 2.370(3)   | C(3)–C(4) | 1.497(7) | C(9)–C(10)  | 1.495(7) |
| Cd(2)–Cl(6) | 2.4559(12) | C(4)–C(5) | 1.357(7) | C(10)–C(11) | 1.352(7) |
| Cd(2)–Cl(5) | 2.5003(13) | C(4)–N(2) | 1.370(7) | C(10)–N(5)  | 1.361(7) |
| Cd(2)–Cl(4) | 2.5180(11) | C(5)–N(3) | 1.366(7) | C(11)–N(6)  | 1.369(7) |
| Cd(2)–Cl(3) | 2.7534(12) | C(6)–N(3) | 1.304(8) | C(12)–N(6)  | 1.324(8) |
|             |            | C(6)–N(2) | 1.329(7) | C(12)–N(5)  | 1.335(7) |

**Table S6.** Hydrogen bond distances (Å) for **L–ZnBr**, **D–ZnBr**, **L–CdCl**, and **D–CdCl**.

| Hydrogen bond distances (Å)                                                    |                     |          |          |
|--------------------------------------------------------------------------------|---------------------|----------|----------|
| Name                                                                           | D–H···A             | d(H···A) | d(D···A) |
| <b>L–ZnBr</b>                                                                  | N(2)–H(2N)···O(2)#1 | 2.07     | 2.832(6) |
|                                                                                | N(1)–H(1B)···O(1)#2 | 2.09     | 2.974(6) |
| Symmetry operation: #1 -x+1,y-1/2,-z+1 ; #2 -x+1,y+1/2,-z+1                    |                     |          |          |
| Hydrogen bond distances (Å)                                                    |                     |          |          |
| Name                                                                           | D–H···A             | d(H···A) | d(D···A) |
| <b>D–ZnBr</b>                                                                  | N(2)–H(2N)···O(2)#1 | 2.07     | 2.830(9) |
|                                                                                | N(1)–H(1C)···O(1)#2 | 2.10     | 2.981(9) |
| Symmetry operation: #1 -x+1,y+1/2,-z+1 #2 -x+1,y-1/2,-z+1                      |                     |          |          |
| Hydrogen bond distances (Å)                                                    |                     |          |          |
| Name                                                                           | D–H···A             | d(H···A) | d(D···A) |
| <b>L–CdCl</b>                                                                  | N(2)–H(2N)···O(4)#1 | 1.96     | 2.722(5) |
|                                                                                | N(1)–H(1B)···O(3)#2 | 1.99     | 2.873(5) |
|                                                                                | N(5)–H(5N)···O(2)#3 | 2.00     | 2.766(5) |
|                                                                                | N(4)–H(4B)···O(1)#4 | 2.06     | 2.923(5) |
| Symmetry operation: #1 x+1,y,z+1; #2 x+1,y+1,z+1; #3 x-1,y-1,z-1; #4 x-1,y,z-1 |                     |          |          |
| Hydrogen bond distances (Å)                                                    |                     |          |          |
| Name                                                                           | D–H···A             | d(H···A) | d(D···A) |
| <b>D–CdCl</b>                                                                  | N(2)–H(2N)···O(4)#1 | 1.95     | 2.714(5) |
|                                                                                | N(1)–H(1C)···O(3)#2 | 1.99     | 2.871(5) |
|                                                                                | N(5)–H(5N)···O(2)#3 | 2.01     | 2.771(5) |
|                                                                                | N(4)–H(4C)···O(1)#4 | 2.06     | 2.927(5) |
| Symmetry operation: #1 x-1,y,z-1; #2 x-1,y-1,z-1; #3 x+1,y+1,z+1; #4 x+1,y,z+1 |                     |          |          |
